# Supplementary material
Source: MDPI journal article supplement (https://www.mdpi.com/2071-1050/13/10/5457)
Supplement: s1 [file s1]

**Pandemic or Environmental Socio-Economic Stressors  
Which Have Greater Impact on Food Security in the  
Barishal Division of Bangladesh: Initial Perspectives  
from Agricultural Officers and Farmers**

**Sayed a Sabrina Ali, Mohammad Raju Ahmad, Jalal Uddin Mohammad Shoaib,  
Mohammad Aliuzzaman Sheik, Mohammad Imam Hoshain, Rebecca L. Hall,  
Katrina A. Macintosh and Paul N. Williams**

**Supplementary Materials**

**Table S1: Previous cyclone frequencies in Barishal region since 2007**

| Name     | Date of occurrence        | Specification                                                                                   | Affected dsitriacts of Barishal division        | Agricultural damages                                                                                                                                                                                                                                                                                                |
|----------|---------------------------|-------------------------------------------------------------------------------------------------|-------------------------------------------------|---------------------------------------------------------------------------------------------------------------------------------------------------------------------------------------------------------------------------------------------------------------------------------------------------------------------|
| Amphan   | 20 May, 2020              | Wind speed 165 km/h, heavy rainfall, 3.6 m tidal surge                                          | Barguna, Bhola, Patuakhali, Pirojpur.           | 176,007 hectares of crops and vegetable affected in 19 coastal districts.                                                                                                                                                                                                                                           |
| Bulbul   | 10 November, 2019         | Wind speed of 155 Km/h, torrential rain, tidal surge of 2 m                                     | Barguna, Bhola, Patuakhali, Pirojpur.           | 117,000 hectares of crops affected in different coastal districs.                                                                                                                                                                                                                                                   |
| Fani     | 4 <sup>th</sup> May, 2019 | wind speed up to 90-110 km/h in gusts/ squalls, heavy rainfall and 1.5 m feet tidal surge water | Barguna, Barishal, Bhola, Patuakhali, Pirojpur. | 63,062 hectares of crop land damaged in 35 different districts in whole Bangladesh.                                                                                                                                                                                                                                 |
| Roanu    | 21 May , 2016             | Winds of over 100km/h, heavy rain and storm surges peaking at 2.7 m.                            | Barguna, Bhola, and Patuakhali.                 | 400 hectares seedbed of Aush paddy, 360 hectares betel leaf orchard, and 3100 hectares of vegetables land were damaged in different coastal districts.<br><br>Around 3451 hectares of Standing crops flooded in 8 upazilas in Patuakhali district.<br><br>About 2200 hectares cropland damaged in Barguna district. |
| Mahasen, | 16 May, 2013              | Wind speed 85 km/h, rainfall and tidal surge of 1.1 m.                                          | Bhola, Barguna, Patuakhali.                     | 46% cuktivated lands in Patuakhali, 57% in Barguna and 28% cultivated lands in Bhola got damaged by Mahasen.                                                                                                                                                                                                        |
| Aila     | 25 May, 2009              | Wind speed of 120 km/h, rainfall and tidal surge of 3m.                                         | Barisal, Bhola, Barguna, Patuakhali, Pirojpur.  | 120,000 hectares crop damaged in 11 coastal districts. 650 hectares standing crop damaged in Barishal, 323 hectares in Bhola,                                                                                                                                                                                       |
| Sidr     | 15 November, 2007         | Wind speed 215 km/h, rainfall and tidal surges of 5m.                                           | Barguna, Patuakhali, Pirojpur                   | 920,000 hectares completely destroyed. 551 000 hectares partially affected,                                                                                                                                                                                                                                         |

(Source: [NAWG](http://NAWG.org); [reliefweb.int](http://reliefweb.int))

Table S2: Time frame of the survey within the cropping period of Bangladesh during the pandemic COVID 19

| Year | Month     | Pandemic                          | Survey | Dry season/winter crops   |            |        | Wet season crops                           |            |        |
|------|-----------|-----------------------------------|--------|---------------------------|------------|--------|--------------------------------------------|------------|--------|
|      |           |                                   |        | <u>Boro</u> (Winter rice) | Vegetables | Fruits | Transplanted <u>aman</u> (Wet season rice) | Vegetables | Fruits |
| 2019 | December  | Detected in Wuhan, China          |        |                           |            |        |                                            |            |        |
| 2020 | January   |                                   |        |                           |            |        |                                            |            |        |
|      | February  |                                   |        |                           |            |        |                                            |            |        |
|      | March     | Infection spreading in Bangladesh |        |                           |            |        |                                            |            |        |
|      | April     |                                   |        |                           |            |        |                                            |            |        |
|      | May       |                                   |        |                           |            |        |                                            |            |        |
|      | June      |                                   |        |                           |            |        |                                            |            |        |
|      | July      |                                   |        |                           |            |        |                                            |            |        |
|      | August    |                                   |        |                           |            |        |                                            |            |        |
|      | September |                                   |        |                           |            |        |                                            |            |        |
|      | October   |                                   |        |                           |            |        |                                            |            |        |
|      | November  |                                   |        |                           |            |        |                                            |            |        |
| 2020 | December  |                                   |        |                           |            |        |                                            |            |        |
| 2021 | January   |                                   |        |                           |            |        |                                            |            |        |

**Table S3: Common fruits grown in Barishal**

| English name | Bengali name | Latin name               | English name | Bengali name | Latin name                      |
|--------------|--------------|--------------------------|--------------|--------------|---------------------------------|
| Coconut      | নারিকেল,     | <i>Cocos nucifera</i>    | Jackfruit    | কাঁঠাল       | <i>Artocarpus heterophyllus</i> |
| Guava        | পেঁয়রা,     | <i>Psidium guajava</i>   | Papaya       | পেঁপে        | <i>Carica papaya</i>            |
| Hog plum     | আমড়া        | <i>Spondias mombin</i>   | Lemon        | লেমু         | <i>Citrus lemon</i>             |
| Watermelon   | তরমুজ        | <i>Citrullus lanatus</i> | Jujube       | কুল / ঝড়ই   | <i>Ziziphus jujuba</i>          |
| Mango        | আম           | <i>Mangifera indica</i>  | Litchi       | লিচু         | <i>Litchi chinensis</i>         |
| Sweet orange | কমলা         | <i>Citrus sinensis</i>   | Dragon fruit |              | <i>Hylocereus undatus</i>       |
| Banana       | কলা          | <i>Musa acuminata</i>    |              |              |                                 |

**Table S4. Common vegetables grown in Barishal.**

| English name | Bengali name | Latin name                             | English name   | Bengali name  | Latin name                 |
|--------------|--------------|----------------------------------------|----------------|---------------|----------------------------|
| Arum         | কচু          | <i>Arum maculatum</i>                  | Bottle gourd   | লাউ           | <i>Lagenaria siceraria</i> |
| Okra         | টেঁড়স       | <i>Abelmoschus esculentus</i>          | Bitter gourd   | করলা          | <i>Momordica charantia</i> |
| Sweet potato | মিষ্টি আলু   | <i>Ipomoea batatas</i>                 | Ridge gourd    | ঝিঞ্জি        | <i>Luffa actuangula</i>    |
| Potato       | আলু          | <i>Solanum tuberosum</i>               | Spinach        | পালং          | <i>Spinacia oleracea</i>   |
| Brinjal      | মেগুন        | <i>Solanum melongena</i>               | Red amaranth   | লাল শাক       | <i>Amaranthus cruentus</i> |
| Cabbage      | পাঁধাকপি     | <i>Brassica oleracea var. capitata</i> | Green amaranth | সবুজ শাক      | <i>Amaranthus viridis</i>  |
| Cauliflower  | ফুলকপি       | <i>Brassica oleracea var. botrytis</i> | Pumpkin        | মিষ্টি কুমড়া | <i>Cucurbita</i>           |
| Long bean    | বরটি         | <i>Vigna unguiculata</i>               |                |               |                            |

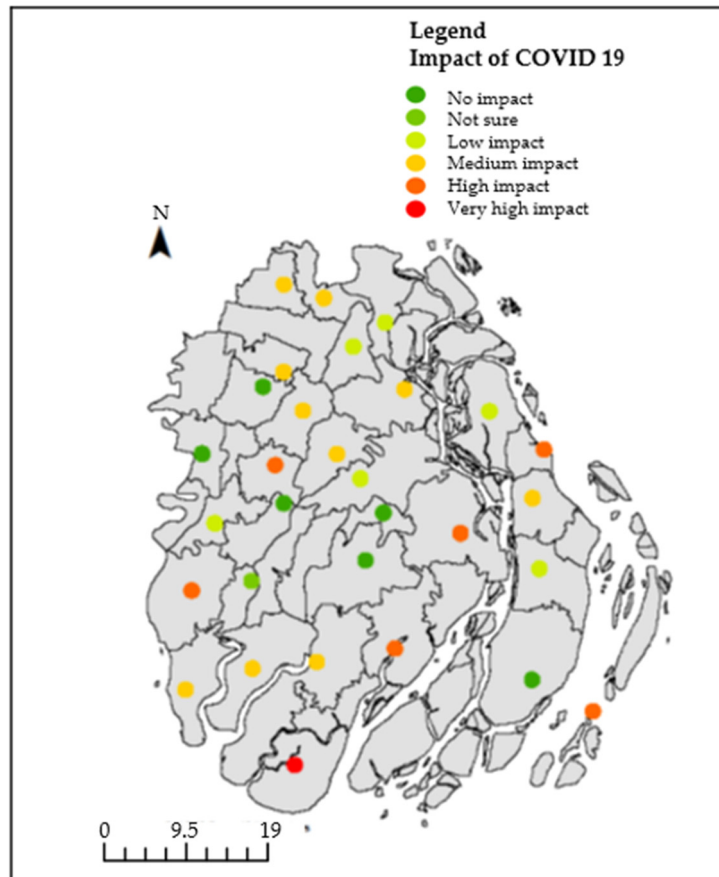

**Figure S1.** The COVID 19 pandemic impacted Upazilas of Barishal Division

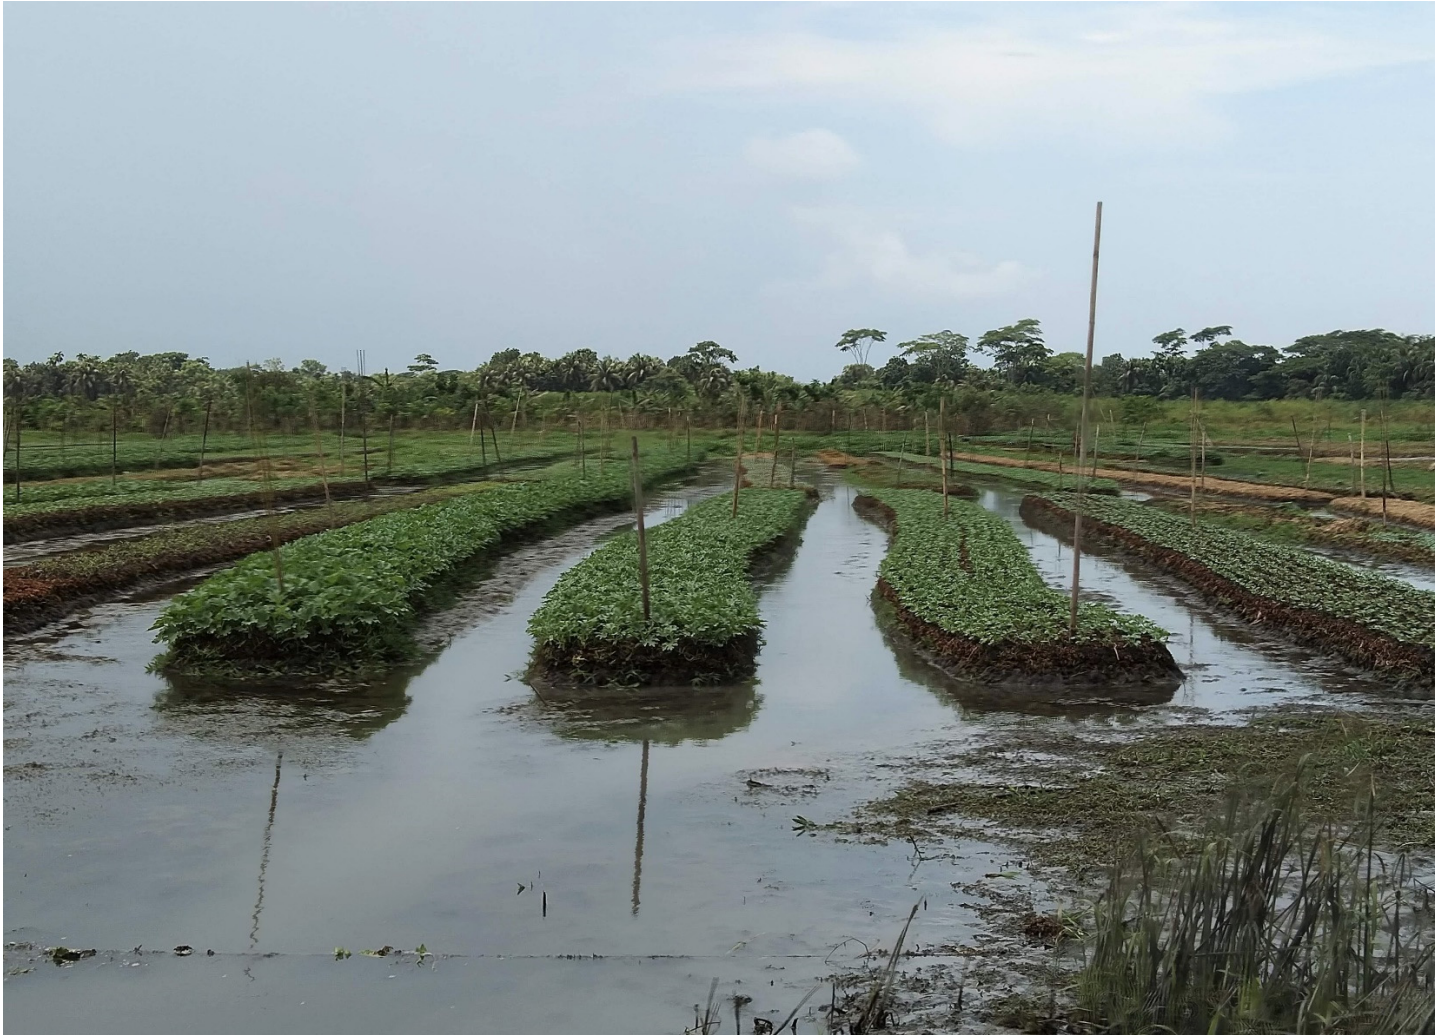

**Figure S2: Floating bed agriculture practised in Barishal**



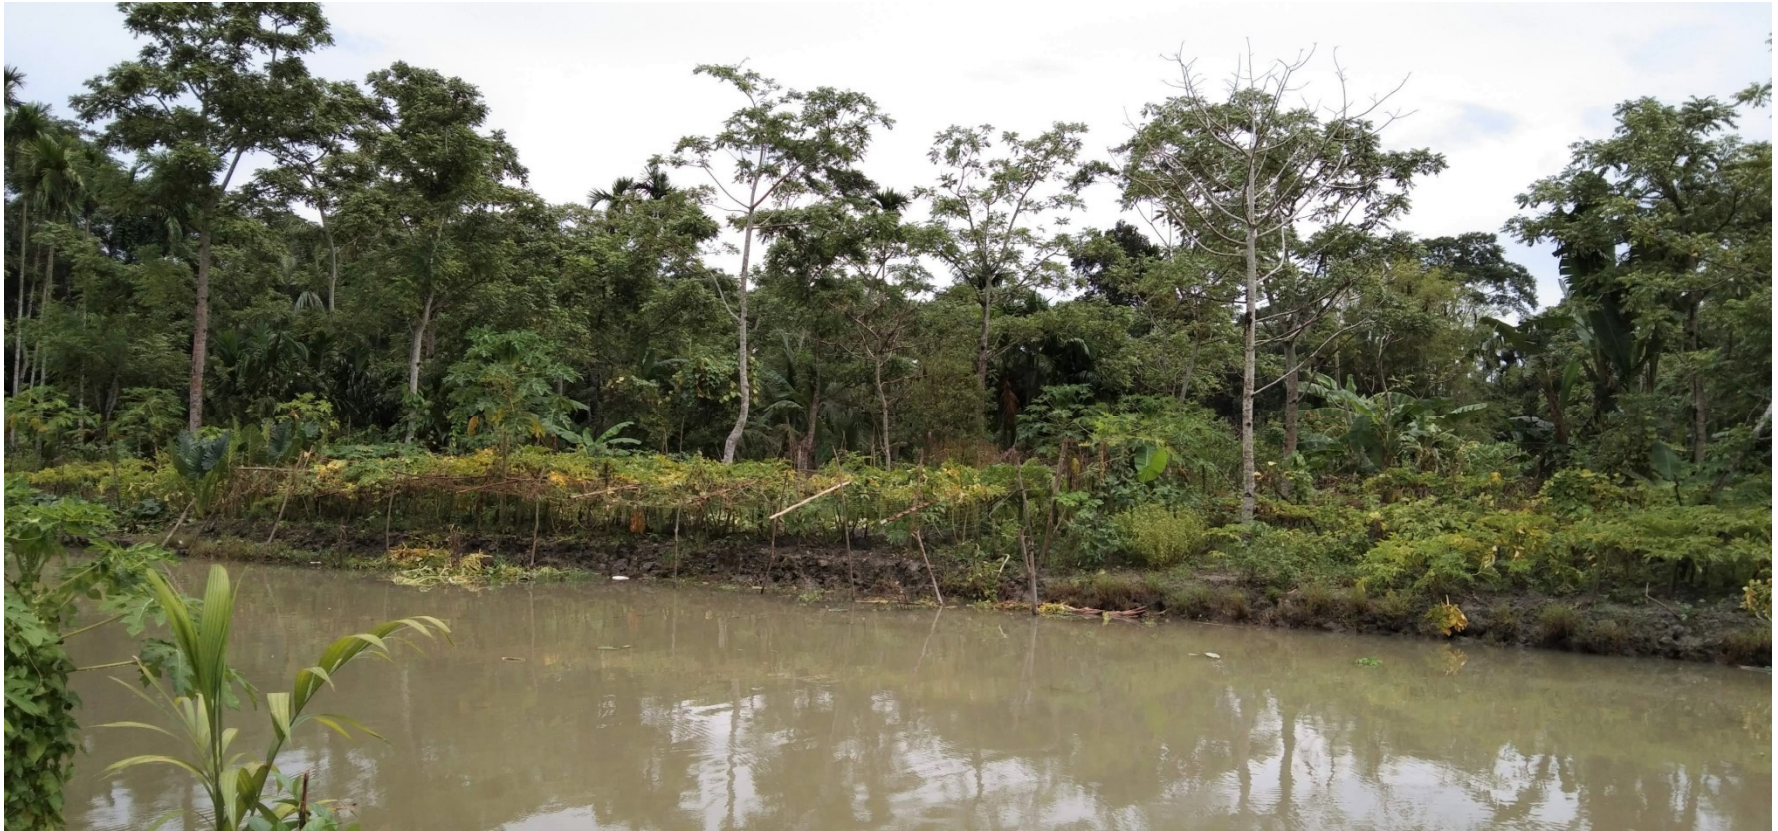

**Figure S3: Sorjan (Ditch and dyke) practised in Barishal**
